# Supplementary material
Source: HighWire-hosted journal article supplement (https://bmjopen.bmj.com/content/15/6/e086699)
Supplement: inline-supplementary-material-1 [file inline-supplementary-material-1.pdf]

**Appendix S1 – Interview Guide**

| <b>A. BACKGROUND CHARACTERISTICS</b>                                     |                                                                                                                                                              |
|--------------------------------------------------------------------------|--------------------------------------------------------------------------------------------------------------------------------------------------------------|
| <b>QUESTION</b>                                                          | <b>PROBES</b>                                                                                                                                                |
| 1. Please could you give me a brief of yourself?                         | a. How old are you?<br>b. Religion?                                                                                                                          |
| 2. Marital status?                                                       | a. Does your role as a family caregiver affecting your marriage?<br>b. Did your spouse consent to your decision of taking up the role as a family caregiver? |
| 3. Employment status?                                                    | a. How are you combining the caregiver's role with your job?                                                                                                 |
| 4. Level of education?                                                   | a. Do you have any knowledge or education in relation to healthcare provision?                                                                               |
| 5. Have you previously cared for someone with a chronic disease?         |                                                                                                                                                              |
| 6. What is your relationship with the care recipient?                    |                                                                                                                                                              |
| 7. How did you become a caregiver to your patient?                       | What happened before you became a caregiver, who decided that you should be the caregiver, and do you like the idea? Why?)                                   |
| 8. How prepared were you to handle this role?                            | Specify the preparation if any?                                                                                                                              |
| 9. How did you feel becoming a family caregiver?                         |                                                                                                                                                              |
| 10. Currently, are you the only caregiver to the patient?                | If no, who are the rest?                                                                                                                                     |
| 11. What were your expectations about being a family caregiver?          | a. Negative or positive? Elaborate                                                                                                                           |
| 12. Can you share with me what you think might have led to the disease?  | a. What in your opinion is the cause of the condition your relative is suffering? (natural or spiritual cause)                                               |
| <b>B. CAREGIVER BURDEN</b>                                               |                                                                                                                                                              |
| 13. What do you do primarily as a caregiver?                             | a. Feeding patient, bathing patient, dressing, toileting, paying of bills, medicine, social support or emotional support, counselling, praying, etc.)        |
| 14. Has your role as a caregiver affected your psychological health      | Frustration, feelings of burnout, isolation                                                                                                                  |
| 15. How do you cope with the psychological challenges of caregiving?     |                                                                                                                                                              |
| 16. How does the caregiving role affect your physical health?            | Fatigue, physical strain, health issues related to caregiving                                                                                                |
| 17. Do you think being a family caregiver has affected your social life? | a. If yes, how? -relate to changes in relationships with friends or family, social isolation                                                                 |
| 18. Can you elaborate on the challenges?                                 | a. Are these Financial? Physical? Psychological? Social? etc.).                                                                                              |
| <b>C. CAREGIVER MOTIVATION</b>                                           |                                                                                                                                                              |
| <b>Reciprocity</b>                                                       |                                                                                                                                                              |
| 19. What motivates you to continue providing care to the care recipient? | Patient's gratitude, desire to give back and emotional attachment                                                                                            |

|                                                                                        |                                                                                                                                                                                                                                                                                                                    |
|----------------------------------------------------------------------------------------|--------------------------------------------------------------------------------------------------------------------------------------------------------------------------------------------------------------------------------------------------------------------------------------------------------------------|
| 20. Do you feel this role has improved your relationship with care recipient?          |                                                                                                                                                                                                                                                                                                                    |
| <b>Socio-cultural Obligation</b>                                                       |                                                                                                                                                                                                                                                                                                                    |
| 21. Do you feel obligated to take on the caregiving role?                              | Cultural expectations, family traditions, societal norms                                                                                                                                                                                                                                                           |
| 22. How do your family and community view caregiving responsibilities?                 | Expectations of caregiving within your community                                                                                                                                                                                                                                                                   |
| <b>Religious Obligation</b>                                                            |                                                                                                                                                                                                                                                                                                                    |
| 23. Does your religious belief influence your role as a caregiver?                     | Religious duty, the role of faith, prayers and spiritual support                                                                                                                                                                                                                                                   |
| 24. Did you receive any support from your religious community in your caregiving role? | Prayers groups, counselling, emotional or financial support                                                                                                                                                                                                                                                        |
| <b>D. OUTCOME OF CAREGIVING</b>                                                        |                                                                                                                                                                                                                                                                                                                    |
| 25. Please share with me the current health status of your care recipient?             | a. Will you say your care recipient's condition is better than before?<br>b. Will you partly attribute the improvement in the care recipient condition to the quality of care you provided?<br>c. How do you feel considering the amount of effort you have put in and still patient's condition is deteriorating? |
